# Supplementary material for: Opposing effects of dopamine on agonistic behaviour in crayfish
Source: Oxford University Press journal article supplement (doi:10.1242/jeb.242057), 2021-05-04
Supplement: jeb242057supp.pdf [file jeb242057supp.pdf]

Table S1 Summary of animals used in experiment 1.

| animals | drug treatment | opponent | sample number | length(cm) | opponent | ration of difference |
|---------|----------------|----------|---------------|------------|----------|----------------------|
| naive L | saline         | naive S  | 19            | 6.4-7.8    | 6.2-7.5  | 1.03-1.06            |
|         | 0.5 $\mu$ M DA | naive S  | 10            | 6.3-7.9    | 5.4-7.5  | 1.03-1.07            |
|         | 1 $\mu$ M DA   | naive S  | 12            | 6.5-8.2    | 6.2-7.8  | 1.03-1.07            |
|         | 2 $\mu$ M DA   | naive S  | 10            | 6.3-7.4    | 6.1-7.2  | 1.03-1.07            |
|         | 5 $\mu$ M DA   | naive S  | 10            | 6.2-8.3    | 6.0-8.0  | 1.03-1.07            |
|         | 10 $\mu$ M DA  | naive S  | 11            | 6.4-8.5    | 6.0-8.2  | 1.03-1.07            |
| naive S | saline         | naive L  | 19            | 6.2-7.6    | 6.6-8.0  | 0.94-0.97            |
|         | 1 $\mu$ M DA   | naive L  | 5             | 6.1-7.6    | 6.3-7.8  | 0.94-0.97            |
|         | 5 $\mu$ M DA   | naive L  | 10            | 6.0-7.1    | 6.2-7.6  | 0.93-0.97            |
|         | 10 $\mu$ M DA  | naive L  | 12            | 6.0-7.9    | 6.3-8.3  | 0.94-0.97            |

Table S2 Summary of animals used in experiment 2.

| animals | drug treatment            | opponent | Sample number | length(cm) | opponent | ration of difference |
|---------|---------------------------|----------|---------------|------------|----------|----------------------|
| subL    | no                        | naive S  | 17            | 6.4-7.8    | 6.2-7.4  | 1.03-1.06            |
|         | saline                    | naive S  | 13            | 6.4-7.8    | 6.2-7.5  | 1.03-1.06            |
|         | 10 $\mu$ M metylergonobin | naive S  | 10            | 6.2-7.7    | 6.0-7.5  | 1.03-1.07            |
|         | 10 $\mu$ M SCH23390       | naive S  | 10            | 6.2-7.4    | 6.0-7.2  | 1.03-1.07            |
|         | 10 $\mu$ M chlorpromazine | naive S  | 11            | 6.3-8.0    | 6.1-7.6  | 1.03-1.07            |
| dom S   | no                        | naive L  | 26            | 6.3-7.5    | 6.7-7.8  | 0.94-0.96            |
|         | saline                    | naive L  | 15            | 6.4-7.4    | 6.8-7.8  | 0.94-0.96            |
|         | 10 $\mu$ M metylergonobin | naive L  | 10            | 6.4-8.0    | 6.7-8.3  | 0.95-0.97            |
|         | 10 $\mu$ M SCH23390       | naive L  | 10            | 6.2-7.6    | 6.5-8.1  | 0.94-0.97            |
|         | 10 $\mu$ M Chlorpromazine | naive L  | 10            | 6.6-8.1    | 6.9-8.5  | 0.94-0.97            |

Table S3 Summary of animals used in experiment 3.

| animals | drug treatment                         | opponent | Sample number | length(cm) | opponent | ration of difference |
|---------|----------------------------------------|----------|---------------|------------|----------|----------------------|
| naive L | 1 $\mu$ M DA                           | naive S  | 13            | 6.5-8.2    | 6.2-7.8  | 1.03-1.07            |
|         | 1 $\mu$ M DA + 10 $\mu$ M SCH23390     | naive S  | 13            | 6.6-8.4    | 6.4-8.1  | 1.03-1.07            |
|         | 1 $\mu$ M DA + 12.5 $\mu$ M epinastine | naive S  | 11            | 6.5-8.3    | 6.1-8.0  | 1.03-1.07            |
|         | 1 $\mu$ M OA                           | naive S  | 18            | 6.6-8.4    | 6.3-8.1  | 1.04-1.06            |
|         | 1 $\mu$ M OA + 12.5 $\mu$ M epinastine | naive S  | 6             | 6.5-8.0    | 6.1-7.6  | 1.04-1.07            |
|         | 1 $\mu$ M OA + 10 $\mu$ M SCH23390     | naive S  | 12            | 6.8-8.2    | 6.4-7.9  | 1.03-1.06            |

Table S4 Summary of animals used in experiment 4.

| animals | drug treatment                            | opponent | Sample number | length(cm) | opponent | ration of difference |
|---------|-------------------------------------------|----------|---------------|------------|----------|----------------------|
| naive S | 10 $\mu$ M DA                             | naive L  | 13            | 6.0-8.2    | 6.4-8.5  | 0.94-0.97            |
|         | 10 $\mu$ M DA + 10 $\mu$ M chlorpromazine | naive L  | 6             | 6.2-7.9    | 6.4-8.4  | 0.94-0.97            |
|         | 10 $\mu$ M DA + 50 $\mu$ M WAY100635      | naive L  | 10            | 6.3-7.6    | 6.6-7.9  | 0.93-0.97            |
|         | 1 $\mu$ M 5HT                             | naive L  | 18            | 6.3-7.4    | 6.5-7.9  | 0.93-0.97            |
|         | 1 $\mu$ M 5HT + 50 $\mu$ M WAY100635      | naive L  | 12            | 6.2-7.7    | 6.5-8.0  | 0.93-0.97            |
|         | 1 $\mu$ M 5HT + 10 $\mu$ M chlorpromazine | naive L  | 10            | 6.3-7.7    | 6.6-8.1  | 0.93-0.97            |
